# Supplementary material for: Role of fluorine surface modification in improving electrochemical cyclability of concentration gradient Li[Ni0.73Co0.12Mn0.15]O2 cathode material for Li-ion batteries
Source: Royal Society of Chemistry journal article supplement (doi:10.1039/c6ra01679k), 2016-01-01
Supplement: c6ra01679k1.pdf [file c6ra01679k1.pdf]

## Supporting Information

### **Role of Fluorine Surface Modification in Improving Electrochemical Cyclability of Concentration Gradient Li[Ni<sub>0.73</sub>Co<sub>0.12</sub>Mn<sub>0.15</sub>]O<sub>2</sub> Cathode Material for Li-Ion Batteries**

Jingpeng Wang, Chunyu Du \*, Chunqiu Yan, Xing Xu, Xiaoshu He, Geping Yin,

Pengjian Zuo, Xinqun Cheng, Yulin Ma, Yunzhi Gao

School of Chemical Engineering & Technology, Harbin Institute of Technology,

Harbin 150001, China.

#### **Corresponding author :**

Dr. Chunyu Du

School of Chemical Engineering and Technology,

Harbin Institute of Technology, Harbin, 150001, China

E-mail: cydu@hit.edu.cn;

Fax: +86-451-86418616;

Tel: +86-451-86403961

Table S1. Atom parameters of the pristine CG  $\text{Li}[\text{Ni}_{0.73}\text{Co}_{0.12}\text{Mn}_{0.15}]\text{O}_2$  and FMCG

$\text{Li}[\text{Ni}_{0.73}\text{Co}_{0.12}\text{Mn}_{0.15}]\text{O}_{1.99}\text{F}_{0.01}$  materials (space group = R-m, occ = site occupancy)

|         | Rwp: 5.8% Rp: 2.9%                                                      |   |       |        | Rwp: 5.0% Rp: 2.7%                                                                          |   |   |       |        |
|---------|-------------------------------------------------------------------------|---|-------|--------|---------------------------------------------------------------------------------------------|---|---|-------|--------|
|         | $\text{Li}[\text{Ni}_{0.73}\text{Co}_{0.12}\text{Mn}_{0.15}]\text{O}_2$ |   |       |        | $\text{Li}[\text{Ni}_{0.73}\text{Co}_{0.12}\text{Mn}_{0.15}]\text{O}_{1.99}\text{F}_{0.01}$ |   |   |       |        |
|         | x                                                                       | y | z     | occ    | x                                                                                           | y | z | occ   |        |
| Li (3a) | 0                                                                       | 0 | 0     | 0.9851 | Li (3a)                                                                                     | 0 | 0 | 0     | 0.9846 |
| Li (3b) | 0                                                                       | 0 | 0.5   | 0.0149 | Li (3b)                                                                                     | 0 | 0 | 0.5   | 0.0154 |
| Ni (3a) | 0                                                                       | 0 | 0     | 0.0149 | Ni (3a)                                                                                     | 0 | 0 | 0     | 0.0154 |
| Ni (3b) | 0                                                                       | 0 | 0.5   | 0.7151 | Ni (3b)                                                                                     | 0 | 0 | 0.5   | 0.7146 |
| Co (3b) | 0                                                                       | 0 | 0.5   | 0.12   | Co (3b)                                                                                     | 0 | 0 | 0.5   | 0.12   |
| Mn (3b) | 0                                                                       | 0 | 0.5   | 0.15   | Mn (3b)                                                                                     | 0 | 0 | 0.5   | 0.15   |
| O (6c)  | 0                                                                       | 0 | 0.259 | 2.00   | O (6c)                                                                                      | 0 | 0 | 0.259 | 1.99   |
| F (6c)  | 0                                                                       | 0 | 0.259 | 0      | F (6c)                                                                                      | 0 | 0 | 0.259 | 0.01   |

Table S2. Atom parameters of the FMCG  $\text{Li}[\text{Ni}_{0.73}\text{Co}_{0.12}\text{Mn}_{0.15}]\text{O}_{1.98}\text{F}_{0.02}$  and FMCG

$\text{Li}[\text{Ni}_{0.73}\text{Co}_{0.12}\text{Mn}_{0.15}]\text{O}_{1.97}\text{F}_{0.03}$  materials (space group = R-m, occ = site occupancy).

|                                                                                             |   |   |       | Rwp:   | Rp:     |                                                                                             |   |       |        | Rwp: | Rp:  |
|---------------------------------------------------------------------------------------------|---|---|-------|--------|---------|---------------------------------------------------------------------------------------------|---|-------|--------|------|------|
| $\text{Li}[\text{Ni}_{0.73}\text{Co}_{0.12}\text{Mn}_{0.15}]\text{O}_{1.98}\text{F}_{0.02}$ |   |   |       | 4.9%   | 2.6%    | $\text{Li}[\text{Ni}_{0.73}\text{Co}_{0.12}\text{Mn}_{0.15}]\text{O}_{1.97}\text{F}_{0.03}$ |   |       |        | 4.9% | 2.7% |
|                                                                                             | x | y | z     | occ    |         | x                                                                                           | y | z     | occ    |      |      |
| Li (3a)                                                                                     | 0 | 0 | 0     | 0.9826 | Li (3a) | 0                                                                                           | 0 | 0     | 0.9807 |      |      |
| Li (3b)                                                                                     | 0 | 0 | 0.5   | 0.0174 | Li (3b) | 0                                                                                           | 0 | 0.5   | 0.0193 |      |      |
| Ni (3a)                                                                                     | 0 | 0 | 0     | 0.0174 | Ni (3a) | 0                                                                                           | 0 | 0     | 0.0193 |      |      |
| Ni (3b)                                                                                     | 0 | 0 | 0.5   | 0.7126 | Ni (3b) | 0                                                                                           | 0 | 0.5   | 0.7107 |      |      |
| Co (3b)                                                                                     | 0 | 0 | 0.5   | 0.12   | Co (3b) | 0                                                                                           | 0 | 0.5   | 0.12   |      |      |
| Mn (3b)                                                                                     | 0 | 0 | 0.5   | 0.15   | Mn (3b) | 0                                                                                           | 0 | 0.5   | 0.15   |      |      |
| O (6c)                                                                                      | 0 | 0 | 0.259 | 1.98   | O (6c)  | 0                                                                                           | 0 | 0.259 | 1.97   |      |      |
| F (6c)                                                                                      | 0 | 0 | 0.259 | 0.02   | F (6c)  | 0                                                                                           | 0 | 0.259 | 0.03   |      |      |

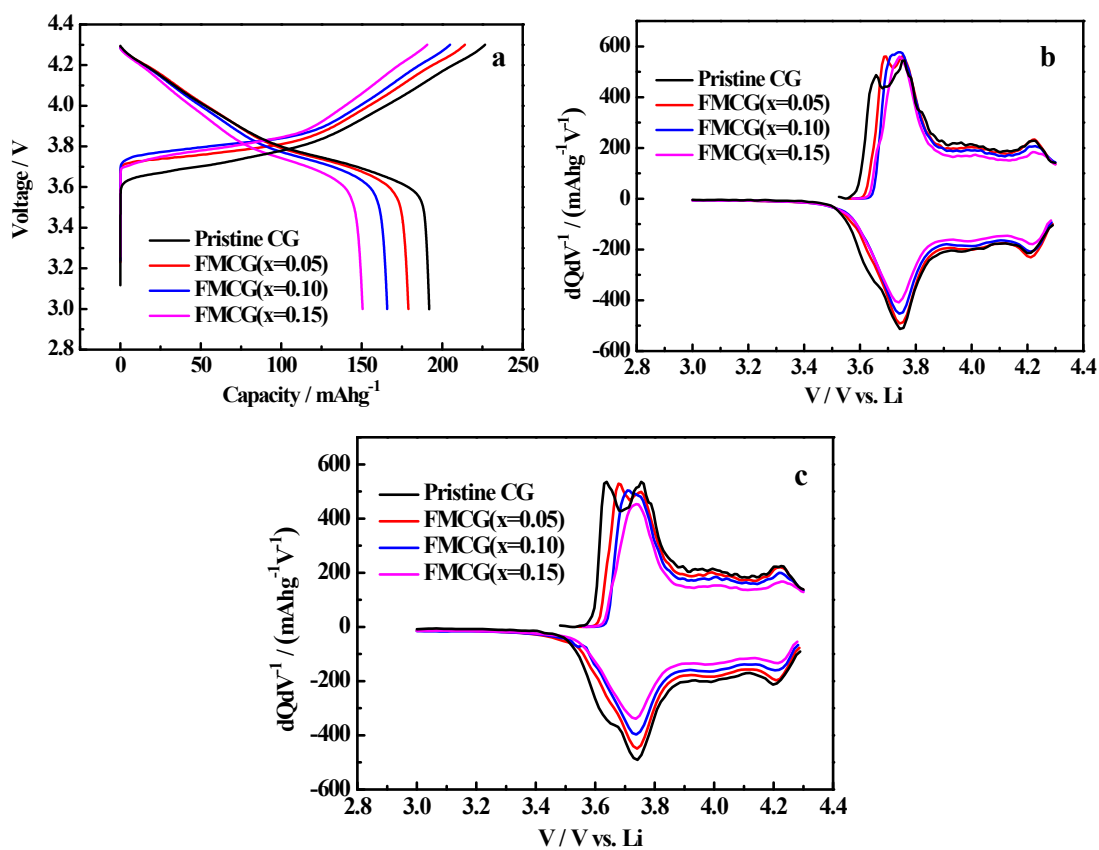

Figure S1. Initial capacities (a), and differential capacity profiles at the 2<sup>nd</sup> (b) and the 10<sup>th</sup> (c) cycles for the pristine CG Li[Ni<sub>0.73</sub>Co<sub>0.12</sub>Mn<sub>0.15</sub>]O<sub>2</sub> and FMCG Li[Ni<sub>0.73</sub>Co<sub>0.12</sub>Mn<sub>0.15</sub>]O<sub>2-x</sub>F<sub>x</sub> (x=0.05, 0.10 and 0.15) cathodes at the current rate of 0.1C between 4.3 V and 3.0 V.

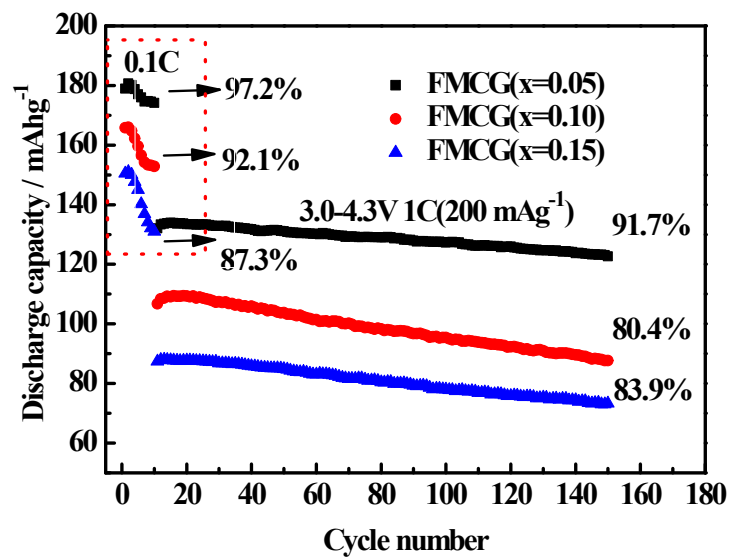

Figure S2. Cycling performance of the FMCG  $\text{Li}[\text{Ni}_{0.73}\text{Co}_{0.12}\text{Mn}_{0.15}]\text{O}_{2-x}\text{F}_x$  ( $x=0.05$ ,  $x=0.10$  and  $x=0.15$ ) cathodes at the current rate of 1C between 4.3 V and 3.0 V.
